# Supplementary material
Source: PubMed Central journal article supplement (PMC2903944)
Supplement: en.2009-0800_1.pdf [file en.2009-0800_1.pdf]

## Supplemental Figures

### REGULATION OF ADIPOGENESIS BY NATURAL AND SYNTHETIC REVERBERB LIGANDS

**Naresh Kumar, Laura A. Solt, Yongjun Wang, Pamela M. Rogers, Gargi Bhattacharyya, Theodore M. Kamenecka, Keith R. Stayrook, Christine Crumbley, Z. Elizabeth Floyd, Jeffrey M. Gimble, Patrick R. Griffin and Thomas P. Burris**

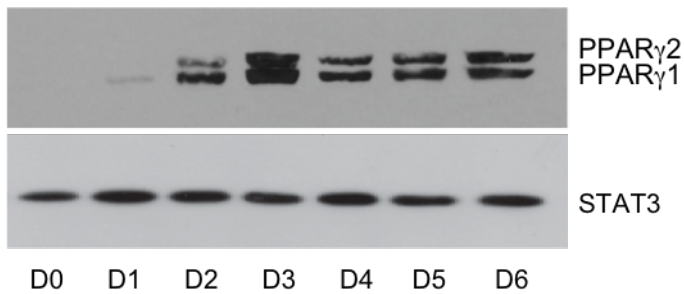

Supplementary Figure 1. Western blot illustrating PPAR $\gamma$  protein expression levels following induction of differentiation using MDI. D0-D6 indicates the number of days following initiation of differentiation by MDI treatment. . STAT3 was used as a loading control.

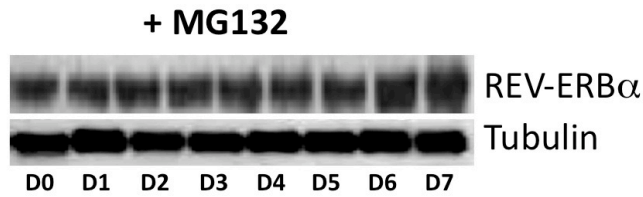

Supplemental Figure 2. Western blot of illustrating REV-ERB $\alpha$  protein expression levels following induction of differentiation using MDI with MG132 present. D0-D7 indicates the number of days following initiation of differentiation by MDI treatment. Tubulin was used as a loading control.

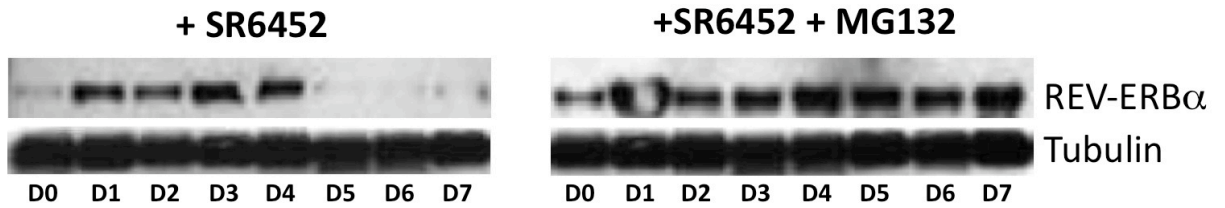

Supplemental Figure 3. Western blot of illustrating REV-ERB $\alpha$  protein expression levels following induction of differentiation using MDI supplemented with 10  $\mu$ M SR6452 with or without MG132 present. D0-D7 indicates the number of days following initiation of differentiation by MDI treatment. Tubulin was used as a loading control.
